# Supplementary material for: Correction of human nonsense mutation via adenine base editing for Duchenne muscular dystrophy treatment in mouse
Source: PubMed Central journal article supplement — Mol Ther Nucleic Acids. 2024 Mar 6;35(2):102165. doi: 10.1016/j.omtn.2024.102165 (PMC10988125; doi:10.1016/j.omtn.2024.102165), 2024-03-06
Supplement: mmc1.pdf [file mmc1.pdf]

OMTN, Volume 35

## **Supplemental information**

### **Correction of human nonsense mutation via adenine base editing for Duchenne muscular dystrophy treatment in mouse**

**Ming Jin, Jiajia Lin, Haisen Li, Zhifang Li, Dong Yang, Yin Wang, Yuyang Yu, Zhurui Shao, Long Chen, Zhiqiang Wang, Yu Zhang, Xiumei Zhang, Ning Wang, Chunlong Xu, Hui Yang, Wan-Jin Chen, and Guoling Li**

## Supplemental Figure legend

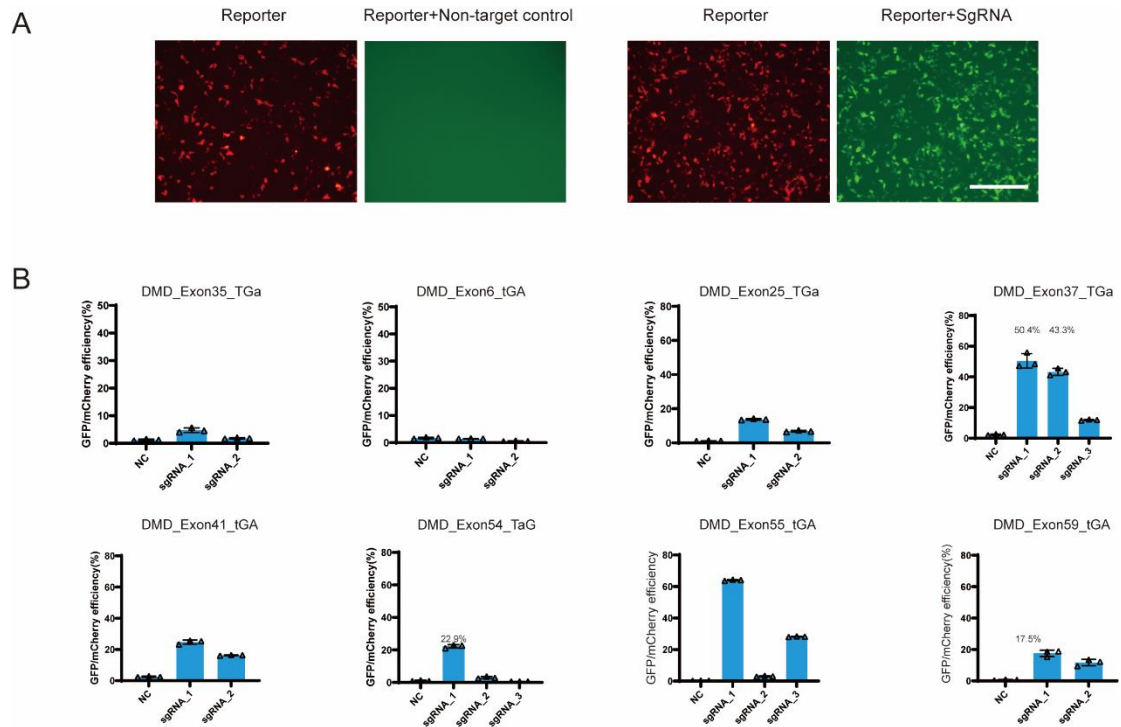

**Figure S1. The efficiency of ABE and human sgRNAs in correcting nonsense mutations *in vitro*.**

**(A)** Representative fluorescence microscopy pictures of mCherry and EGFP expressions in HEK293T cells after transfection of the reporter plasmid alone or its combination with ABE construct. Scale bar, 200  $\mu$ m. **(B)** FACS detection of EGFP expression levels in HEK293T cells treated with SpG-ABE and sgRNAs targeting human exon 4, 6, 21, 25, 35, 37, 41, 54, 55, and 59 (n=3). Quantification is present as mean  $\pm$  SEM. \*P < 0.05; \*\*P < 0.01; \*\*\*P < 0.001.

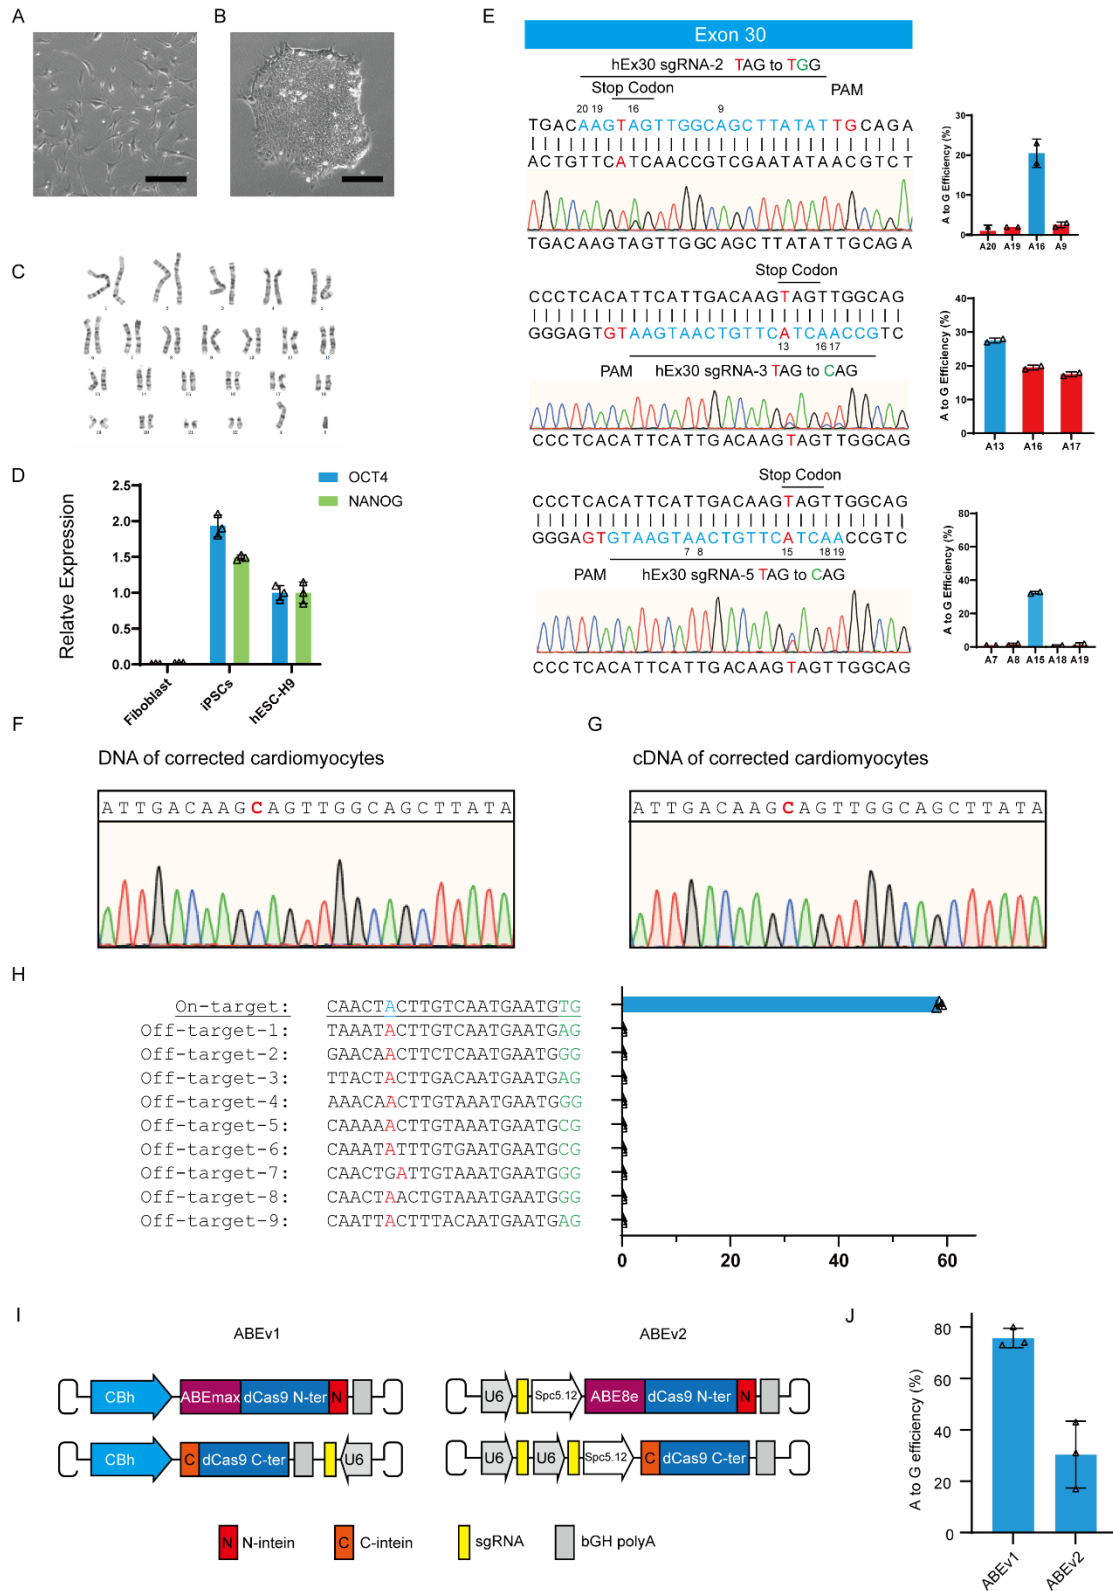

**Figure S2. Characterization of human DMD iPSC cells and off-target analysis.**

**(A)** Representative morphology of DMD patient fibroblasts. The image was taken under a light microscope at 10x. **(B)** Representative picture of human DMD iPSC

colony. The picture was conducted with a light microscope at 20 $\times$ . **(C)** Karyotype analysis of human DMD iPSC cells. **(D)** RT-PCR analyses of pluripotency markers OCT4 and NANOG in human DMD iPSC and normal H9 cells (n=3). DMD patient fibroblast was used as the negative control. **(E) Left:** Schematic for the binding position of hEx30 sgRNA-2, sgRNA-3, or sgRNA-5 in the exon 30 mutant. The PAM and sgRNA sequences are present in red and blue respectively. The adenines are numbered from the PAM. The representative chromatogram of genomic sequencing was performed in human DMD iPSCs. **Right:** The percentages of genomic edits by full-length SpG-ABE and hEx30 sgRNA in human DMD iPSCs (n=3). On-target editing is shown in blue. **(F)** Sanger sequence of corrected cardiomyocyte DNA. **(G)** Sanger sequence of corrected cardiomyocyte cDNA. **(H)** Deep sequencing analysis of genomic modifications at the on-target and top predicated off-target sites of hEx30 sgRNA-3 (n=3). On-target editing is present in blue. **(I)** Illustration for the intein-mediated split-SpG-ABE systems. The N- and C-terminal ABEs in the ABEv1 or ABEv2 system are driven by the promoter CBh or SPc5-12 respectively, while human sgRNA cassette in both ABEv1 and ABEv2 systems is controlled by the U6 promoter. **(J)** The percentages of DNA edits at the A15 in human DMD iPSCs treated with hEx30 sgRNA-4 and split-SpG-ABE systems (n= 3). Quantitative data are presented as mean  $\pm$  SEM.

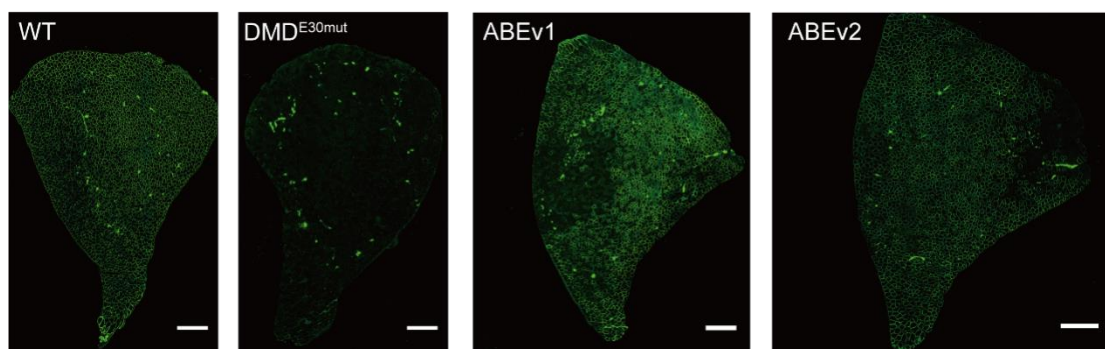

**Figure S3. ABE-driven restoration of dystrophin expression in skeletal muscles of adult DMD<sup>E30mut</sup> mice.**

Immunofluorescence analysis of dystrophin protein expression in entire TA muscles of WT mice and DMD<sup>E30mut</sup> mice with ABE or saline treatment. Dystrophin is present in green. Scale bar, 500  $\mu$ m.

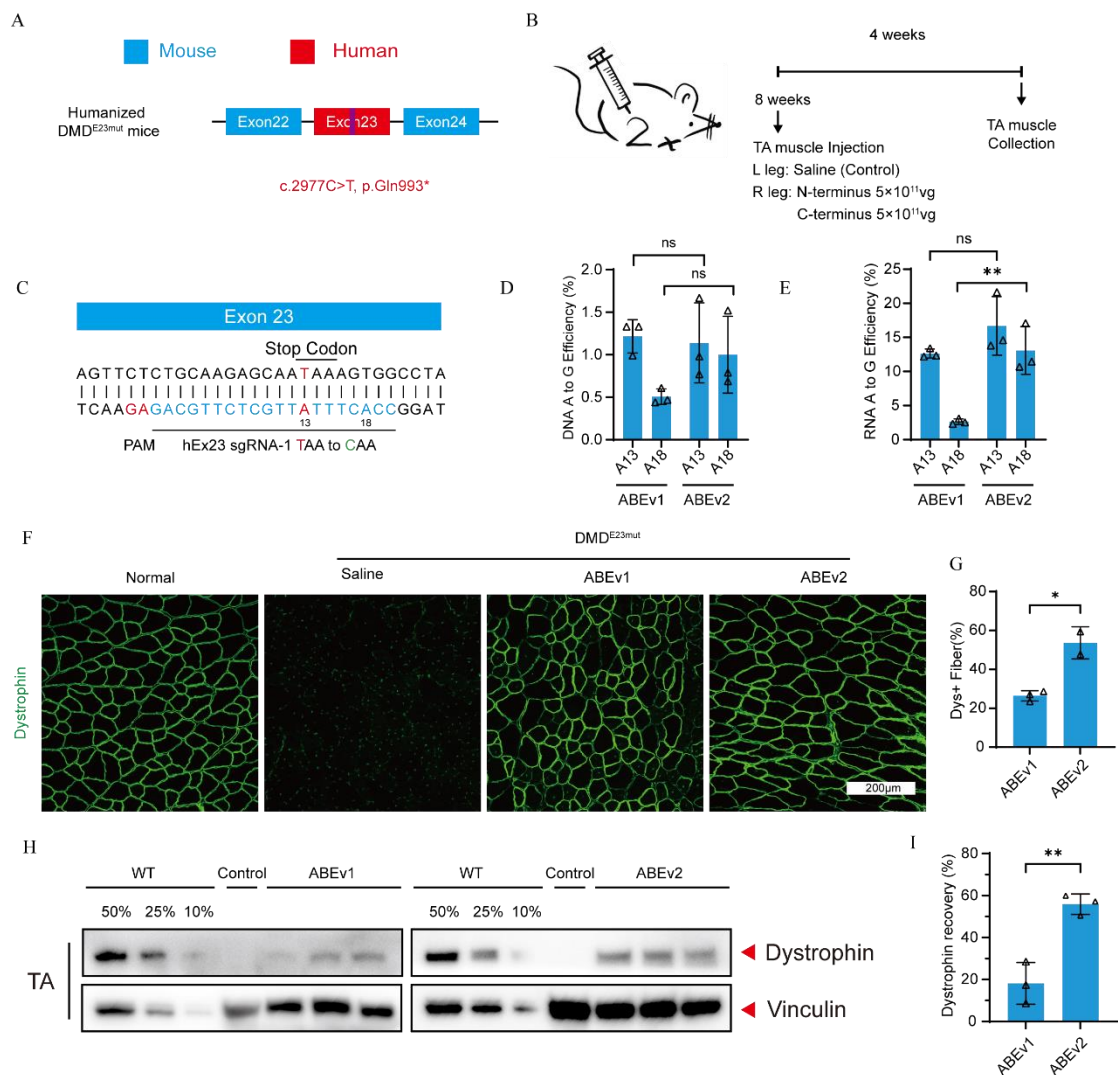

**Figure S4. Local ABE delivery rescues dystrophin expression in adult DMD<sup>E23mut</sup> mice.**

(A) Illustration for the nonsense c.2977C>T mutation in human exon 23 sequence of the humanized DMD<sup>E23mut</sup> mice. (B) Illustration for the intramuscular infusion of split-ABE components in 8-week-old humanized DMD<sup>E23mut</sup> mice. Mouse right TA muscles were infused with N- and C-terminal ABEs by the AAV9 particles at the total dose of 5 × 10<sup>11</sup> vg/leg, while the left legs receiving saline treatment were the negative controls. (C) Schematic for the binding position of hEx23 sgRNA-1 in the exon 23 mutant. The PAM and sgRNA are shown in red and blue respectively. The adenines in the editing window are numbered from the PAM. (D) The percentages of genomic editing events in mouse TA muscles with saline or ABE treatment (n=3). (E) The

percentages of modification events in the transcripts of mouse TA muscles receiving saline or ABE treatment (n=3). **(F)** Immunohistochemistry of dystrophin expression in the TA muscles of age-matched WT mice and DMD<sup>E23mut</sup> mice with ABE or saline treatment. Dystrophin is present in green. Scale bar, 200  $\mu$ m. **(G)** Quantification of dystrophin+ myofibers in the cross-sections of mouse TA muscles with ABE or saline treatment (n=3). **(H)** Western blotting of dystrophin and vinculin proteins in the TA muscles of age-matched WT mice and DMD<sup>E23mut</sup> mice with ABE or saline treatment. The proteins from WT mice were used to standardize dystrophin expression levels. **(I)** Quantification of dystrophin expression level in ABE-treated DMD<sup>E23mut</sup> mice after normalization to vinculin expression (n=3). Quantification is shown as mean  $\pm$  SEM. Each triangle represents an individual mouse. NS, not significant; \*P < 0.05; \*\*P < 0.01.

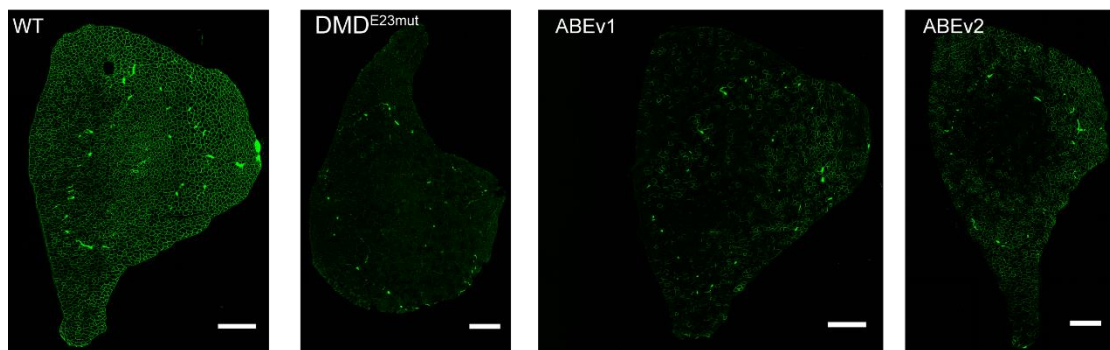

**Figure S5. Restoration of dystrophin expression after local ABE infusion in DMD<sup>E23mut</sup> mice.**

Immunohistochemistry of dystrophin expression in entire TA muscles of WT mice and DMD<sup>E23mut</sup> mice without or with ABE treatment. Dystrophin is shown in green. Scale bar, 500  $\mu$ m.



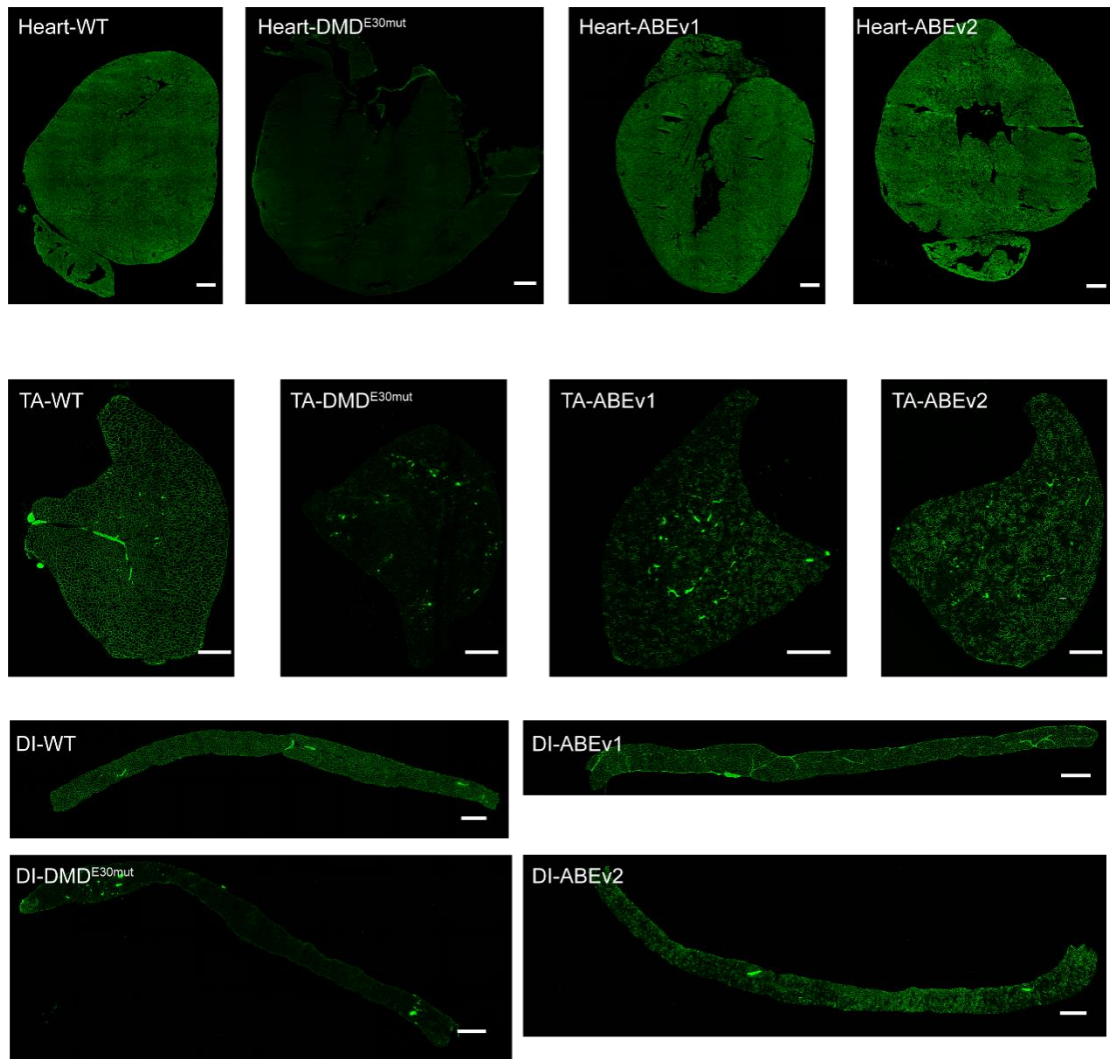

**Figure S6. Body-wide dystrophin restoration by systemic ABE administration in neonatal DMD<sup>E30mut</sup> mice.**

Immunohistochemistry of dystrophin protein in entire HE, DI, and TA tissues from WT mice and DMD<sup>E30mut</sup> mice receiving saline or ABE treatment. Dystrophin is present in green. Scale bar, 500  $\mu$ m.

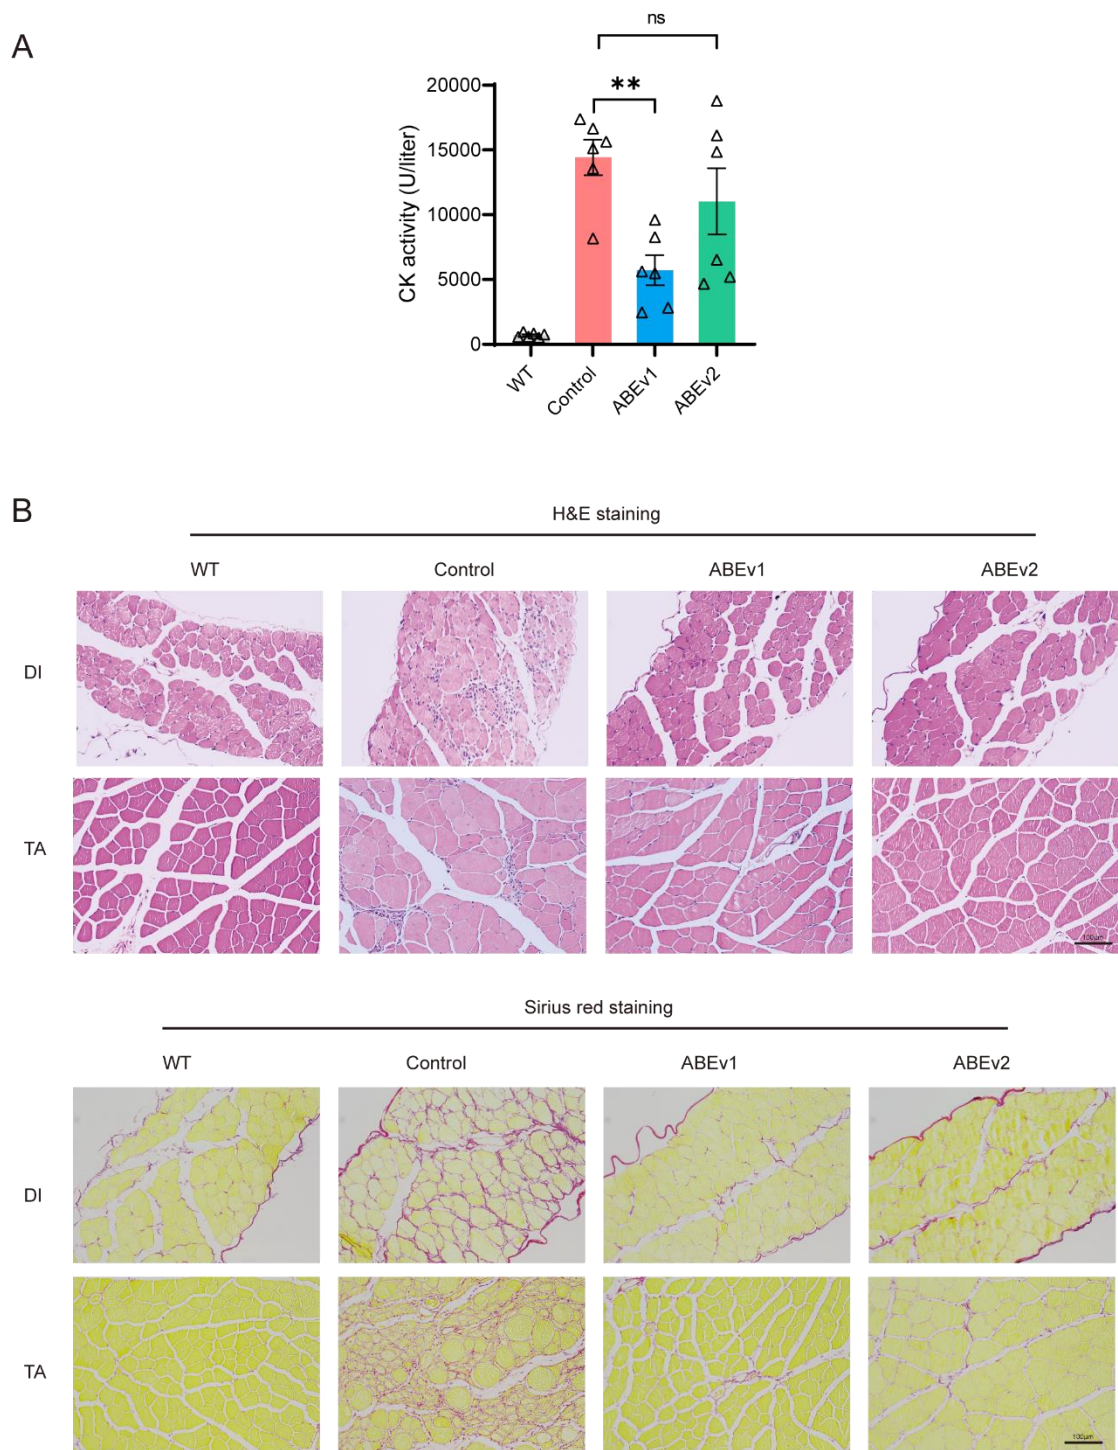

**Figure S7. H&E histology staining and CK analysis results after ABE systemic administration. (A)** Characterization of CK activity after intraperitoneal injection (n=6). Significance is indicated by asterisk and determined using unpaired two-tailed Student's t test. ns represents not statistically significant. **(B)** H&E and Sirius red staining of TA and DI muscle of WT, untreated, and AAV-ABE treated DMD mice. Scale bars, 100µm.



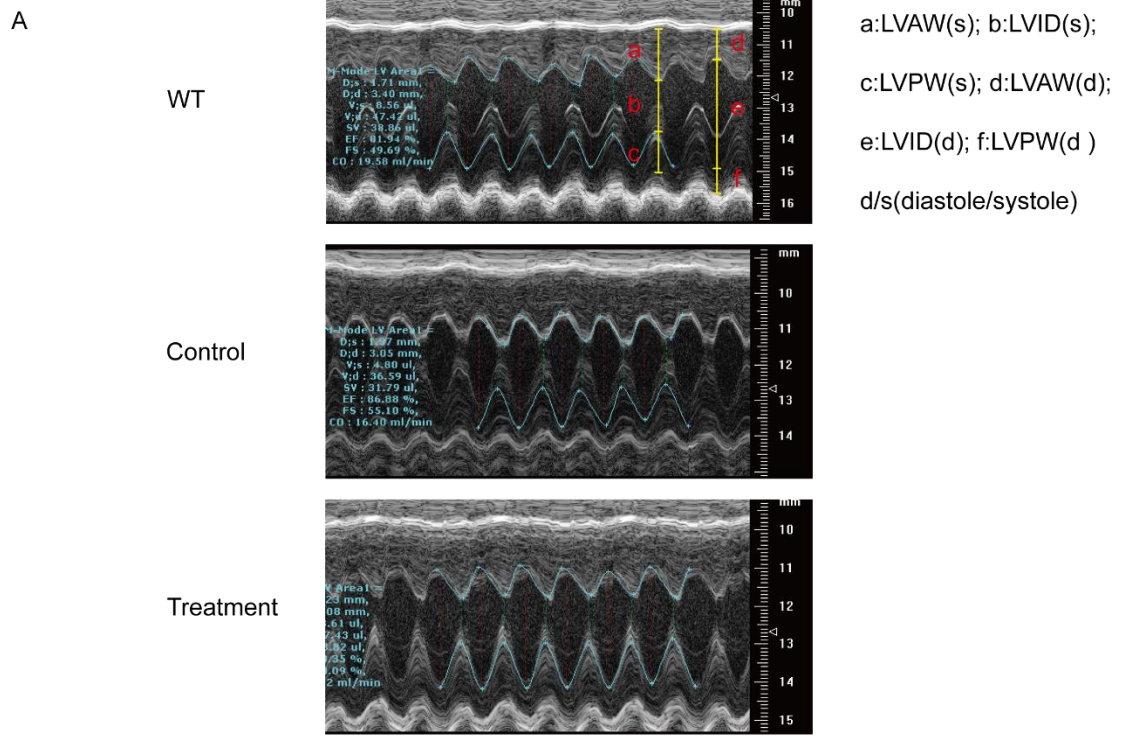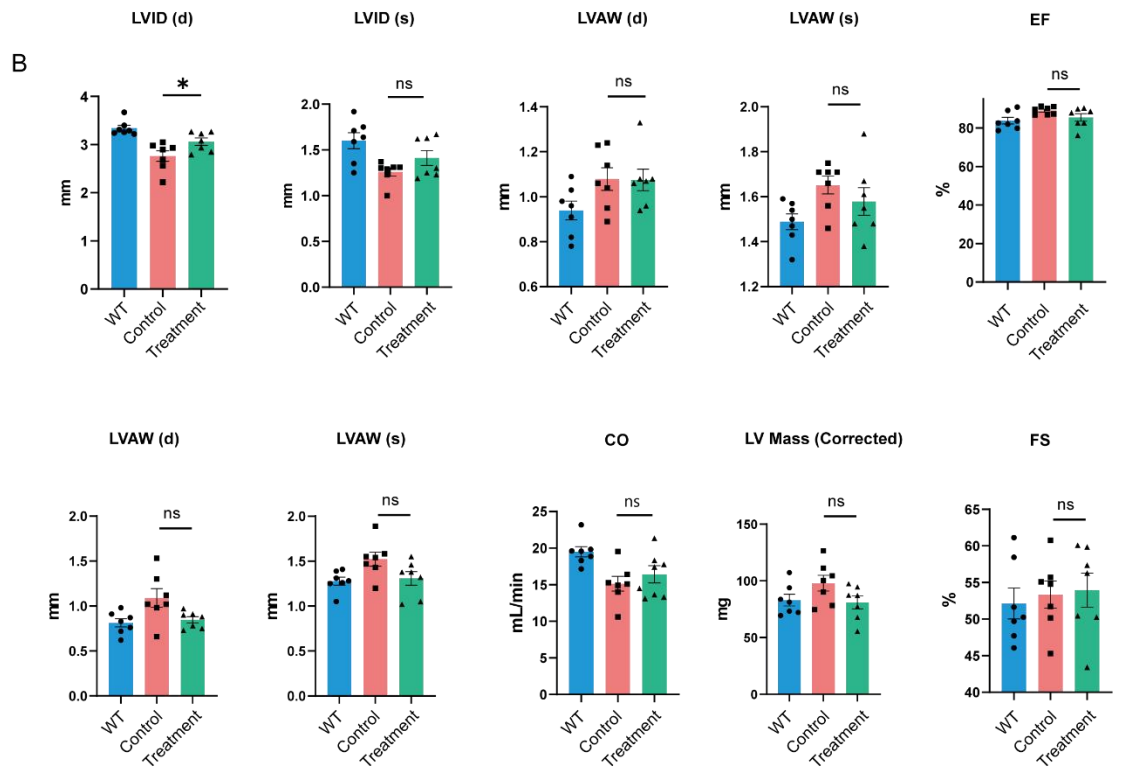

**Figure S8. Echocardiography was used to assess the cardiac function of DMD mice after systemic delivery of ABEv2.**

**(A)** Representative echocardiographic image for DMD<sup>E30mut</sup> mice with or without

ABEv2 administration were monitored for 6 weeks. Age-matched wild-type and DMD mice were included as controls.

**(B)** Echocardiographic analysis was performed in WT, DMD-mock, and DMD mice treated with ABEv2 after 6 weeks injection. LVID;d or LVID;s: Left Ventricular Internal Diameter during diastole or systole; LVPW;d or LVPW;s: Left Ventricular Posterior Wall Thickness during diastole or systole; LVAW;d or LVAW;s: Left Ventricular Anterior Wall Thickness during diastole or systole; EF: Ejection Fraction; FS: Fractional Shortening; CO: Cardiac Output; LV Mass (corrected): Left Ventricular Mass corrected for body surface area. Values are shown as mean  $\pm$  SEM. Significance is indicated by asterisk and determined using unpaired two-tailed Student's t test. NS represents not statistically significant.

**Table S1. Nonsense mutation of patients in our database**

| Gender | Diagnose at Age | Diagnosis | Mutant                      | Codon | Nonsense Mutation |
|--------|-----------------|-----------|-----------------------------|-------|-------------------|
| M      | 3               | DMD       | E6, c.433 C > T, p.Arg145*  | CGA   | TGA               |
| M      | 8               | DMD       | E23, c.2977C>T, p.Gln993*   | CAA   | TAA               |
| M      | 9               | DMD       | E24, c.3189G>A, p.Trp1063*  | TGG   | TGA               |
| M      | 5               | DMD       | E25, c.3414G>A, p.Trp1138*  | TGG   | TGA               |
| M      | 8               | DMD       | E30, c.4174C>T, p.Gln1392*  | CAG   | TAG               |
| M      | 7               | DMD       | E35, c.4996C>T, p.Arg1666*  | CGA   | TGA               |
| M      | 4               | DMD       | E37, c.5247C>A, p.Cys1749*  | TGC   | TGA               |
| M      | 7               | DMD       | E41, c.5899C>T, p.Arg1967*  | CGA   | TGA               |
| M      | 6               | DMD       | E44, c.6292C>T,p.Arg2098*   | CGA   | TGA               |
| M      | 7               | DMD       | E54, c.8009 A>G, p.Trp2670* | TGG   | TAG               |
| M      | 6               | DMD       | E55, c.8038C>T,p.Arg2680*   | CGA   | TGA               |
| M      | 7               | DMD       | E56, c.8230G>T, p.Glu2744*  | GAA   | TAA               |
| M      | 10              | DMD       | E59, c.8713C>T,p.Arg2950*   | CGA   | TGA               |
| M      | 6               | DMD       | E34, c.4729C>T, p.Arg768*   | CGA   | TGA               |
| M      | 6               | DMD       | E19, c.2302C>T,p.Arg1577*   | CGA   | TGA               |
| M      | 3               | DMD       | E21,c.2695G>T,p.Glu899*     | GAG   | TAG               |
| M      | 10              | DMD       | E21,c.2776C>T,p.Gln926*     | CAG   | TAG               |
| M      | 4               | DMD       | E20,c.2527G>T,p.Glu843*     | GAG   | TAG               |
| M      | 7               | DMD       | E41,c.5899C>T,p.Arg1967*    | CGA   | TGA               |
| M      | 9               | DMD       | E24,c.3189G>A,p.Trp1063*    | TGG   | TGA               |
| M      | 3               | DMD       | E25,c.3337C>T,p.Gln1113*    | CAG   | TAG               |
| M      | 1               | DMD       | E43,c.6188T>A,p.Leu2063*    | TTG   | TAG               |
| M      | 8               | DMD       | E30,c.4117C>T,p.Gln1373*    | CAG   | TAG               |
| M      | 4               | DMD       | E20,c.2407C>T,p.Gln803*     | CAA   | TAA               |
| M      | 10              | DMD       | E70,c.10141C>T,p.Arg3381*   | CGA   | TGA               |
| M      | 6               | DMD       | E36,c.5125A>T,Lys1709*      | AAA   | TAA               |

**Table S2 Target sgRNA and primer sequence.**

| Experiment                                | Primer name                  | Primer sequence (5'-3')    |
|-------------------------------------------|------------------------------|----------------------------|
| PCR primer flanking human exon 30         | hDMD_420F                    | CCAGGAAGCTGCGAAATCTG       |
|                                           | hDMD_420R                    | TCAGTGAATCAAAACAACCCCA     |
| RT-PCR primer flanking human exon 30      | RT-hDMD-665F                 | GCGACATTCAGAGGATAACCC      |
|                                           | RT-hDMD-665R                 | CTGTACAATCTGACGTCCAGT      |
| qPCR primer of human OCT4                 | hOCT4_qPCR_f                 | CAGTGCCCGAAACCCACAC        |
|                                           | hOCT4_qPCR_r                 | GGAGACCCAGCAGCCTCAAA       |
| qPCR primer of human NANOG                | hNANOG_qPCR_f                | CAGAAGGCCTCAGCACCTAC       |
|                                           | hNANOG_qPCR_r                | ATTGTTCCAGGTCTGGTTGC       |
| Genotyping of DMD <sup>E30mut</sup> mice  | DMD <sup>E30mut</sup> -2333F | ATTCATATAGGGCTTCAGTTCC     |
|                                           | DMD <sup>E30mut</sup> -2333R | CATCTGTTTTAATAGTGTGCAT     |
| RT-PCR of DMD <sup>E30mut</sup> mice      | RT-mDMD-358F                 | AATCAGATTCGTCTATTGGCACA    |
|                                           | RT-mDMD-358R                 | CCTTTTGGTTGGCATCCTT        |
| Genotyping of DMD <sup>E23mut</sup> mice  | DMD <sup>E23mut</sup> -2395F | CACTTTACCACCAATGCGCTA      |
|                                           | DMD <sup>E23mut</sup> -2395R | AAGAAAATGCAAAAGGACCCC      |
| RT-PCR of DMD <sup>E23mut</sup> mice      | RT-mDMD-618F                 | CACTTTACCACCAATGCGCTA      |
|                                           | RT-mDMD-618R                 | CGGCATATGTGATCCCCT         |
| DNA base editing sgRNA in DMD c.433 C > T | sgRNA1_F                     | caccgATTGTCaGACCCAGCTCAGG  |
|                                           | sgRNA1_R                     | aaacCCTGAGCTGGGTcTgACAATc  |
|                                           | sgRNA2_F                     | caccgTGATTGTCaGACCCAGCTCA  |
|                                           | sgRNA2_R                     | aaacTGAGCTGGGTcTgACAATCAc  |
| DNA base editing sgRNA in DMD c.2977C>T   | sgRNA3_F                     | caccgccactttAttgctctgcag   |
|                                           | sgRNA3_R                     | aaacctgcaagagcaaTaaagtggc  |
|                                           | sgRNA4_F                     | caccgccactttAttgctctgc     |
|                                           | sgRNA4_R                     | aaacgcaagagcaaTaaagtggcc   |
|                                           | sgRNA5_F                     | caccgataggccactttAttgctct  |
| sgRNA5_R                                  | aaacagagcaaTaaagtggcctatc    |                            |
| DNA base editing sgRNA in DMD c.3189G>A   | sgRNA6_F                     | caccgAAATGAATGGCTGAAGTTGA  |
|                                           | sgRNA6_R                     | aaacTCAACTTCAGCCATTCATTTc  |
|                                           | sgRNA7_F                     | caccgAAGAAATGAATGGCTGAAGT  |
|                                           | sgRNA7_R                     | aaacACTTCAGCCATTCATTTCTTc  |
|                                           | sgRNA8_F                     | caccgCCATTCATTTCTTCAGGGTT  |
|                                           | sgRNA8_R                     | aaacAACCCCTGAAGAAATGAATGGc |
| DNA base editing sgRNA in DMD c.3414G>A   | sgRNA9_F                     | caccGTGaGATCACATGTGCCAAC   |
|                                           | sgRNA9_R                     | aaacGTTGGCACATGTGATCtCAC   |
|                                           | sgRNA10_F                    | caccgTGTGATCtCACTGAGTGTTA  |
|                                           | sgRNA10_R                    | aaacTAACACTCAGTGAATGATCACc |
|                                           | sgRNA11_F                    | caccgAAGtAGTTGGCAGCTTATAT  |

|                                            |           |                            |
|--------------------------------------------|-----------|----------------------------|
| DNA base editing sgRNA in<br>DMD c.4174C>T | sgRNA11_R | aaacATATAAGCTGCCAACTaCTTc  |
|                                            | sgRNA12_F | caccgAGtAGTTGGCAGCTTATAT   |
|                                            | sgRNA12_R | aaacATATAAGCTGCCAACTaCTc   |
|                                            | sgRNA13_F | caccGCCAACTaCTTGTCAATGAA   |
|                                            | sgRNA13_R | aaacTTCATTGACAAGtAGTTGGC   |
|                                            | sgRNA14_F | caccgCAACTaCTTGTCAATGAATG  |
|                                            | sgRNA14_R | aaacCATTcATTGACAAGtAGTTGc  |
|                                            | sgRNA15_F | caccgAACTaCTTGTCAATGAATG   |
|                                            | sgRNA15_R | aaacCATTcATTGACAAGtAGTTc   |
| DNA base editing sgRNA in<br>DMD c.4996C>T | sgRNA16_F | caccgTCaGGAGGTGACAGCTATCC  |
|                                            | sgRNA16_R | aaacGGATAGCTGTcACCTCCtGAc  |
|                                            | sgRNA17_F | caccgCACCTCCtGAGCAGAAGAGT  |
|                                            | sgRNA17_R | aaacACTCTTCTGCTCaGGAGGTGc  |
| DNA base editing sgRNA in<br>DMD c.5247C>A | sgRNA18_F | caccgCTtCAGTGGTCACCGCGGTT  |
|                                            | sgRNA18_R | aaacAACCGCGGTGACCACTGaAGc  |
|                                            | sgRNA19_F | caccgCCACTGaAGGAAATTAGTAG  |
|                                            | sgRNA19_R | aaacCTACTAATTTCTtCAGTGGc   |
|                                            | sgRNA20_F | caccgTTTCCTtCAGTGGTCACCGC  |
|                                            | sgRNA20_R | aaacGCGGTGACCACTGaAGGAAAc  |
| DNA base editing sgRNA in<br>DMD c.5899C>T | sgRNA21_F | caccgTCTTCaAAACTGAGCAAATT  |
|                                            | sgRNA21_R | aaacAATTTGCTCAGTTtGAAGAc   |
|                                            | sgRNA22_F | caccgCAGTTtGAAGACTCAACTT   |
|                                            | sgRNA22_R | aaacAAGTTGAGTCTTCaAAACTGc  |
| DNA base editing sgRNA in<br>DMD c.6292C>T | sgRNA23_F | caccgAAATCACCCTTGTcGGTCTCT |
|                                            | sgRNA23_R | aaacAGGACCGACAAGGGTGATTTc  |
|                                            | sgRNA24_F | caccGGGTGATTTGACAGATCTGT   |
|                                            | sgRNA24_R | aaacACAGATCTGTCAAATCACCC   |
|                                            | sgRNA25_F | caccgCAAGGGTGATTTGACAGATC  |
|                                            | sgRNA25_R | aaacGATCTGTCAAATCACCCTTGc  |
| DNA base editing sgRNA in<br>DMD c.8009A>G | sgRNA26_F | caccgctTagagaagcattcataaa  |
|                                            | sgRNA26_R | aaactggatcttttctAAGgttc    |
|                                            | sgRNA27_F | caccgTTagagaagcattcataaaa  |
|                                            | sgRNA27_R | aaactttatgaatgcttctAc      |
|                                            | sgRNA28_F | caccgaatgcttctAagaggcat    |
|                                            | sgRNA28_R | aaacatgcctctTagagaagcattc  |
| DNA base editing sgRNA in<br>DMD c.8038C>T | sgRNA29_F | caccGAGTGAGAGGCTGCTTTGGA   |
|                                            | sgRNA29_R | aaacTCCAAGCAGCCTCTCACTC    |
|                                            | sgRNA30_F | caccgAGTGAGTGAGAGGCTGCTTT  |
|                                            | sgRNA30_R | aaacAAAGCAGCCTCTCACTCACTc  |
|                                            | sgRNA31_F | caccgCTCACTCACTCACCCTTTTA  |
|                                            | sgRNA31_R | aaacTAAAAGGGTGAGTGAGTGAGc  |
| DNA base editing sgRNA in<br>DMD c.8713C>T | sgRNA32_F | caccgCTGCTTTCATAGAAGCCGAG  |
|                                            | sgRNA32_R | aaacCTCGGCTTCTATGAAAGCAGc  |



|  |           |                           |
|--|-----------|---------------------------|
|  | sgRNA33_F | caccgCTATGAAAGCAGGCTGAGGA |
|  | sgRNA33_R | aaacTCCTCAGCCTGCTTTCATAGc |
